# Supplementary material
Source: MDPI journal article supplement (https://www.mdpi.com/2673-8112/2/1/5)
Supplement: s1 [file s1]

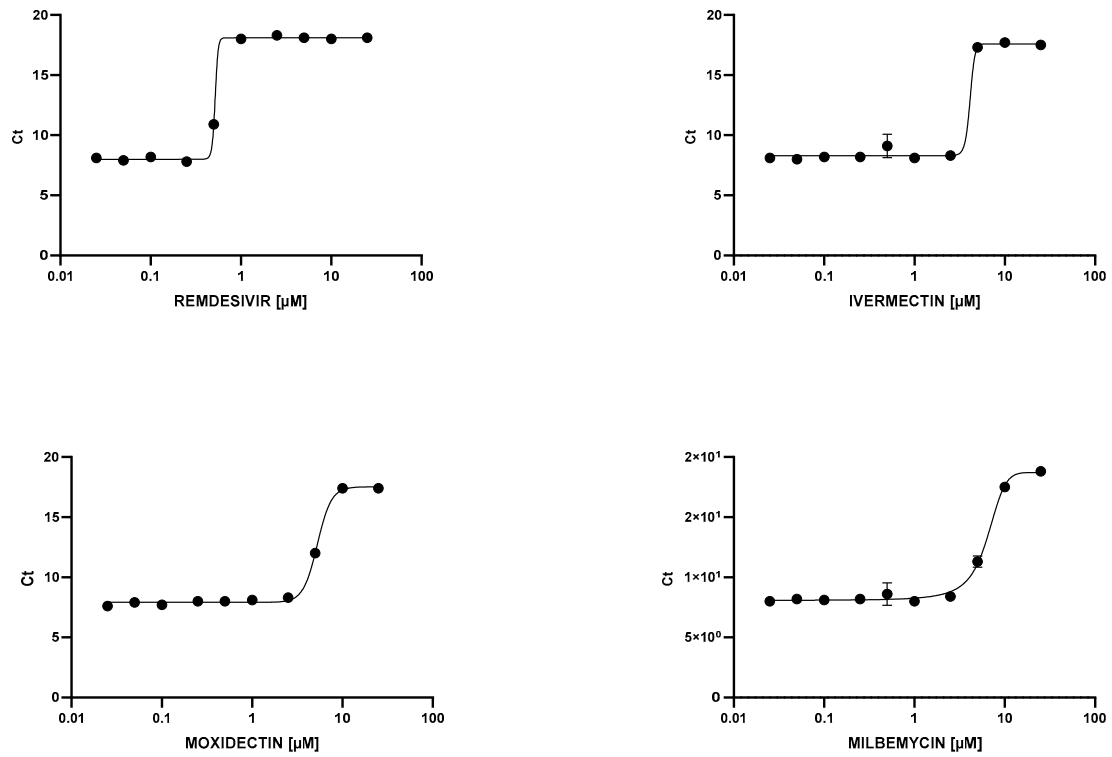

**Figure S1.** RT-qPCR, cycle threshold (Ct) from viral supernatant at 72 hours in A549-hACE2 cells. A549-hACE2 were infected with SARS-CoV-2 at a MOI of 0.01 with 0.025, 0.05, 0.1, 0.25, 0.5, 1, 2.5, 5, 10 and 25  $\mu\text{M}$  of the indicated compounds and incubated for 72 hours. Data points are mean values and bars are the standard deviation of three independent experiments performed in duplicate.

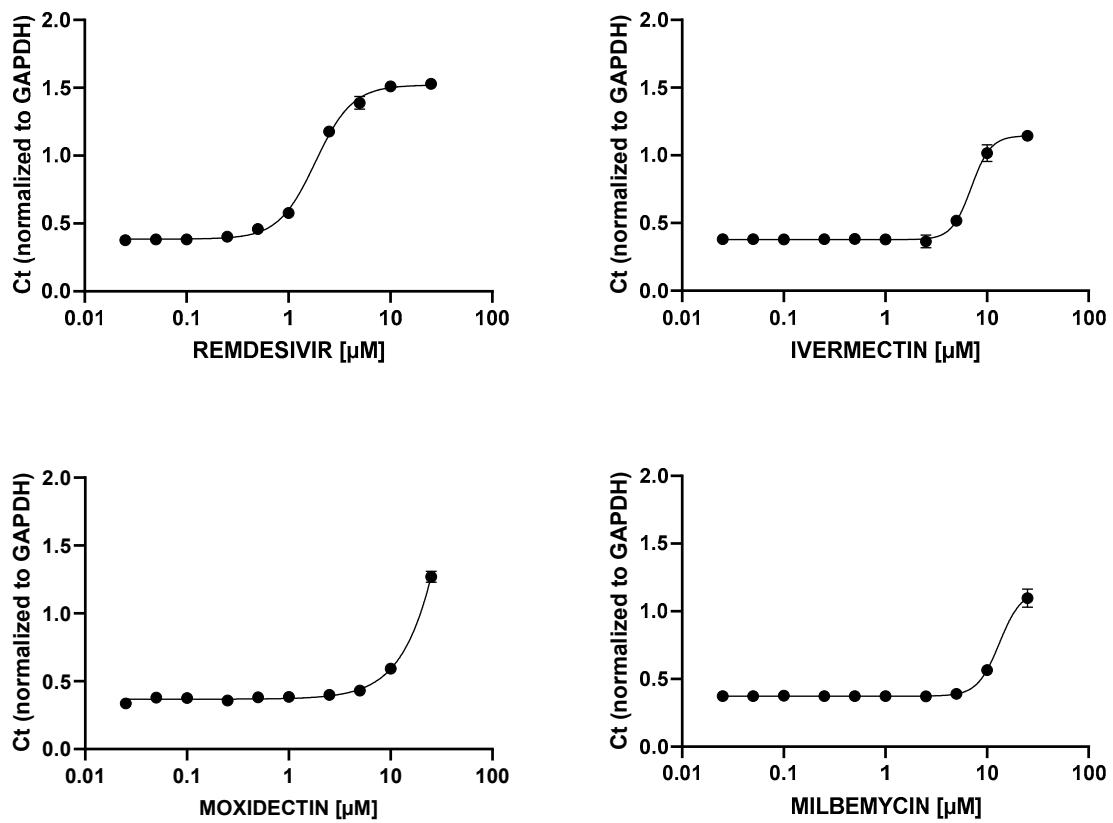

**Figure S2.** RT-qPCR, cycle threshold (Ct) from viral supernatant at 72 hours in Calu-3 cells. Calu-3 cells were infected with SARS-CoV-2 at a MOI of 0.01 with 0.025, 0.05, 0.1, 0.25, 0.5, 1, 2.5, 5, 10 and 25  $\mu\text{M}$  of the indicated compounds and incubated for 72 hours. Data points are mean values and bars are the standard deviation of three independent experiments performed in duplicate.
